# Supplementary material
Source: Elsevier journal article supplement (https://www.sciencedirect.com/science/article/pii/S0210569118303371)
Supplement: mmc1 [file S0210569118303371:mmc1.pdf]

## SUPPLEMENTARY MATERIAL

**Table S1** Moreno PIRO score

| Moreno PIRO Score                                   |     |                      |             |        |     |           |                |    |        |        |     |
|-----------------------------------------------------|-----|----------------------|-------------|--------|-----|-----------|----------------|----|--------|--------|-----|
| Box1:                                               | 0   | 4                    | 5           | 6      | 7   | 8         | 9              | 10 | 11     | 14     | 16  |
| Predisposition                                      |     |                      |             |        |     |           |                |    |        |        |     |
| Age, years                                          | <40 | ≥40<60               |             |        |     | ≥60<70    |                |    | ≥70<75 | ≥75<80 | ≥80 |
| Location from which the patient was admitted to ICU |     | Same hospital        |             |        |     |           |                |    |        |        |     |
| Comorbidities                                       |     |                      |             | Cancer |     | Cirrhosis | AIDS           |    |        |        |     |
| Length of stay before ICU admission, days           | <14 |                      | ≥14<28      |        | ≥28 |           |                |    |        |        |     |
| Reason(s)forICU admission                           |     |                      |             |        |     |           | Cardiac arrest |    |        |        |     |
| Box2:Infection                                      | 0   | 4                    | 5           | 7      | 8   | 9         | 10             | 11 | 14     | 16     |     |
| Acquisition                                         |     | Nosocomial           |             |        |     |           |                |    |        |        |     |
| Extension                                           |     | Other than localized |             |        |     |           |                |    |        |        |     |
| Site                                                |     |                      | Respiratory |        |     |           |                |    |        |        |     |
| Agent                                               |     |                      |             |        |     |           | Candida, fungi |    |        |        |     |
| Box3:Response                                       | 0   | 4                    | 5           | 7      | 8   | 9         | 10             | 11 | 14     | 16     |     |
| Organ dysfunction (OD)                              |     | Renal                | Coagulation |        |     |           |                |    |        |        |     |

|                    |  |  |                               |  |  |                          |  |  |  |  |  |
|--------------------|--|--|-------------------------------|--|--|--------------------------|--|--|--|--|--|
| Organ failure (OF) |  |  | Cardiovascular<br>respiratory |  |  | CNS,coagulation<br>renal |  |  |  |  |  |
|--------------------|--|--|-------------------------------|--|--|--------------------------|--|--|--|--|--|

**Table S2** Rubulotta PIRO Score

| Stratification Level |                                             |                                         |                                                                        |                                                                                                                     |                                                   |
|----------------------|---------------------------------------------|-----------------------------------------|------------------------------------------------------------------------|---------------------------------------------------------------------------------------------------------------------|---------------------------------------------------|
| Domain               | 0                                           | 1                                       | 2                                                                      | 3                                                                                                                   | 4                                                 |
| Predisposition       | P0<br>Age<46yrs                             | P1<br>Age46-64yrs,noCLD                 | P2<br>Age64-85yrs,noCLD<br>and no congestive<br>cardiomyopathy         | P3<br>Age46-64yrs with<br>CLD or 64-85yrs with<br>congestive<br>Cardiomyopathy                                      | P4<br>Age64-85yrs with<br>CLD or age>85yrs        |
| Insult/infection     | 10<br>CA-UTI Gram-<br>negative              | 11<br>CA-UTI not Gram-<br>negative      | 12<br>CA infection except<br>CA-UTI or<br>nosocomial Gram-<br>positive | 13<br>Nosocomial acquired<br>infection except<br>Gram-positive or<br>nosocomial fungal<br>nonabdominal<br>infection | 14<br>Nosocomial<br>abdominal fungal<br>infection |
| Response             | R0<br>No tachycardia and/or<br>no tachypnea | R1<br>Both tachycardia and<br>tachypnea |                                                                        |                                                                                                                     |                                                   |
| Organ dysfunction    | O0<br>2 OF                                  | O1<br>3 OF,1 hepatic                    | O2<br>3 OF, none hepatic                                               | O3<br>4 OF                                                                                                          | O4<br>5 OF                                        |

**Table S3** Howell PIRO Score

Howell PIRO Score

| PIRO Score               |        |                            |        |                         |        |                         |        |
|--------------------------|--------|----------------------------|--------|-------------------------|--------|-------------------------|--------|
| P Score                  |        | I Score                    |        | R Score                 |        | O Score                 |        |
|                          | Points |                            | Points |                         | Points |                         | Points |
| Age                      |        | Pneumonia                  | 4      | Respiratory rate >20    | 3      | BUN>20                  | 2      |
| <65                      | 0      | Skin/soft tissue infection | 0      | Bands>5%                | 1      | Resp failure/ hypoxemia | 3      |
| 65-80                    | 1      | Any other infection        | 2      | Heart rate >120         | 2      | Lactate>4.0             | 3      |
| >80                      | 2      | Total Possible I Points    | 4      | Total Possible R Points | 6      | Systolic Blood Pressure |        |
| COPD                     | 1      |                            |        |                         |        | <70                     | 4      |
| Liver Disease            | 2      |                            |        |                         |        | 70-90                   | 2      |
| Nursing Home Resident    | 2      |                            |        |                         |        | >90                     | 0      |
| Malignancy               |        |                            |        |                         |        | Platelet Count <150,000 | 2      |
| Without metastases       | 1      |                            |        |                         |        | Total Possible O Points | 14     |
| With metastaese          | 2      |                            |        |                         |        |                         |        |
| Total Possible P Points  | 9      |                            |        |                         |        |                         |        |
| <b>P +I +R +O = PIRO</b> |        |                            |        |                         |        |                         |        |

**Table S4** Sequential Organ Failure Assessment (SOFA) score

| Scores<br>Parameters                                     | 0                  | 1           | 2                                              | 3                                                                                | 4                                                                  |
|----------------------------------------------------------|--------------------|-------------|------------------------------------------------|----------------------------------------------------------------------------------|--------------------------------------------------------------------|
| Cardiovascular                                           | MAP $\geq$ 70 mmHg | MAP<70 mmHg | Dopamine <5 ug/kg/min<br>Dobutamine (any dose) | Dopamine 5.1-15 ug/kg/min,<br>Epinephrine or Norepinephrine $\leq$ 0.1 ug/kg/min | *DA>15 ug/kg/min,<br>Epinephrine or Norepinephrine > 0.1 ug/kg/min |
| Respiratory<br>PaO <sub>2</sub> /FiO <sub>2</sub> (mmHg) | $\geq$ 400         | <400        | < 300                                          | <200 with respiratory support                                                    | <100 with respiratory support                                      |
| Renal<br>Creatinine, (mg/dL)                             | <1.2               | 1.2-1.9     | 2.0-3.4                                        | 3.5-4.9                                                                          | >5.0                                                               |
| Urine output (mL/day)                                    |                    |             |                                                | <500                                                                             | <200                                                               |
| Liver,<br>Bilirubin, (mg/dL)                             | <1.2               | 1.2-1.9     | 2.0-5.9                                        | 6.0-11.9                                                                         | >12.0                                                              |
| Coagulation<br>Platelets, $\times 10^3$ /uL              | $\geq$ 150         | <150        | <100                                           | <50                                                                              | <20                                                                |
| Central nervous system/<br>Glasgow Coma Score            | 15                 | 13-14       | 10-12                                          | 6-9                                                                              | <6                                                                 |

**Table S5** Systemic inflammatory response syndrome criteria (SIRS)

1. Temperature  $>38^{\circ}\text{C}$  or  $<36^{\circ}\text{C}$
2. Heart rate  $> 90$  /min
3. Respiratory rate  $> 20$  /min or  $\text{PaCO}_2 < 32$  mmHg
4. White blood cells count  $>12,000$  or  $< 4,000$  cells/ $\text{mm}^3$  or bandemia  $> 10\%$

**Table S6** Quick Sequential Organ Failure Assessment (qSOFA) score

Two or more criteria of

1. Systolic blood pressure (SBP)  $\leq$  100 mmHg
2. Respiratory rate  $\geq$  22 /min
3. Glasgow Coma Score (GCS)  $\leq$  13

**Table S7** P-value comparison between the area under receiving operating characteristic (AUC) of sepsis-base scores to predict ICU mortality

| Score (AUC, 95%CI)                  | SIRS   | Moreno | Rubulotta | Howell | SOFA   |
|-------------------------------------|--------|--------|-----------|--------|--------|
| SIRS (0.595, 0.573-0.618)           |        |        |           |        |        |
| Moreno PIRO (0.804, 0.785-0.823)    | <0.001 |        |           |        |        |
| Rubulotta PIRO (0.699, 0.676-0.722) | <0.001 | <0.001 |           |        |        |
| Howell PIRO (0.703, 0.680-0.725)    | <0.001 | <0.001 | 0.74      |        |        |
| SOFA (0.838, 0.820-0.855)           | <0.001 | <0.001 | <0.001    | <0.001 |        |
| qSOFA (0.787, 0.770-0.805)          | <0.001 | 0.15   | <0.001    | <0.001 | <0.001 |



**Table S8** P-value comparison between the area under receiving operating characteristic (AUC) of sepsis-base scores to predict hospital mortality in subgroup analysis (n = 1,239)

| Score (AUC, 95%CI)                  | SIRS   | Moreno | Rubulotta | Howell | SOFA   |
|-------------------------------------|--------|--------|-----------|--------|--------|
| SIRS (0.587, 0.557-0.616)           |        |        |           |        |        |
| Moreno PIRO (0.869, 0.849-0.889)    | <0.001 |        |           |        |        |
| Rubulotta PIRO (0.721, 0.693-0.748) | <0.001 | <0.001 |           |        |        |
| Howell PIRO (0.724, 0.696-0.752)    | <0.001 | <0.001 | 0.79      |        |        |
| SOFA (0.883, 0.864-0.901)           | <0.001 | 0.14   | <0.001    | <0.001 |        |
| qSOFA (0.839, 0.819-0.860)          | <0.001 | 0.02   | <0.001    | <0.001 | <0.001 |

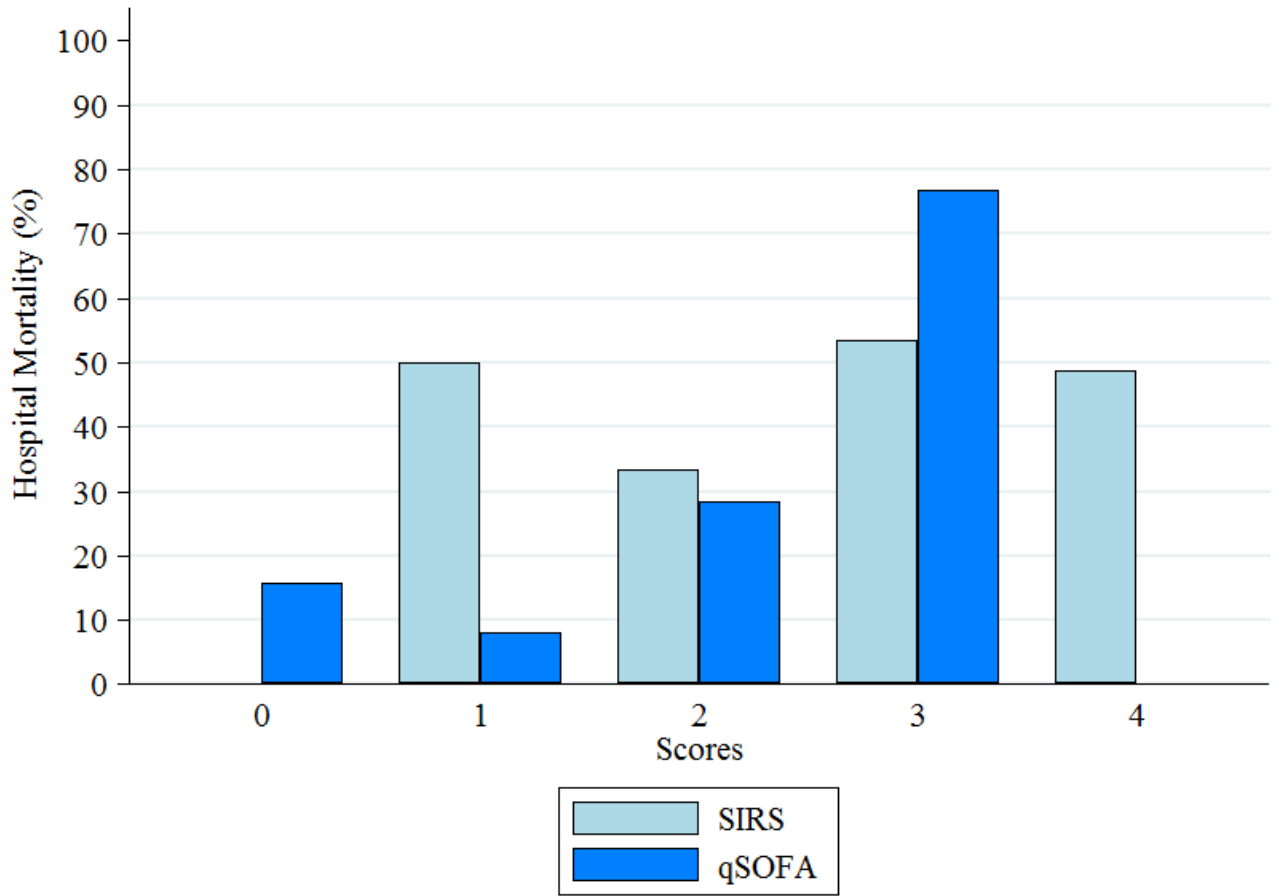

**Figure S1** Mortality risk stratified by SIRS and qSOFA

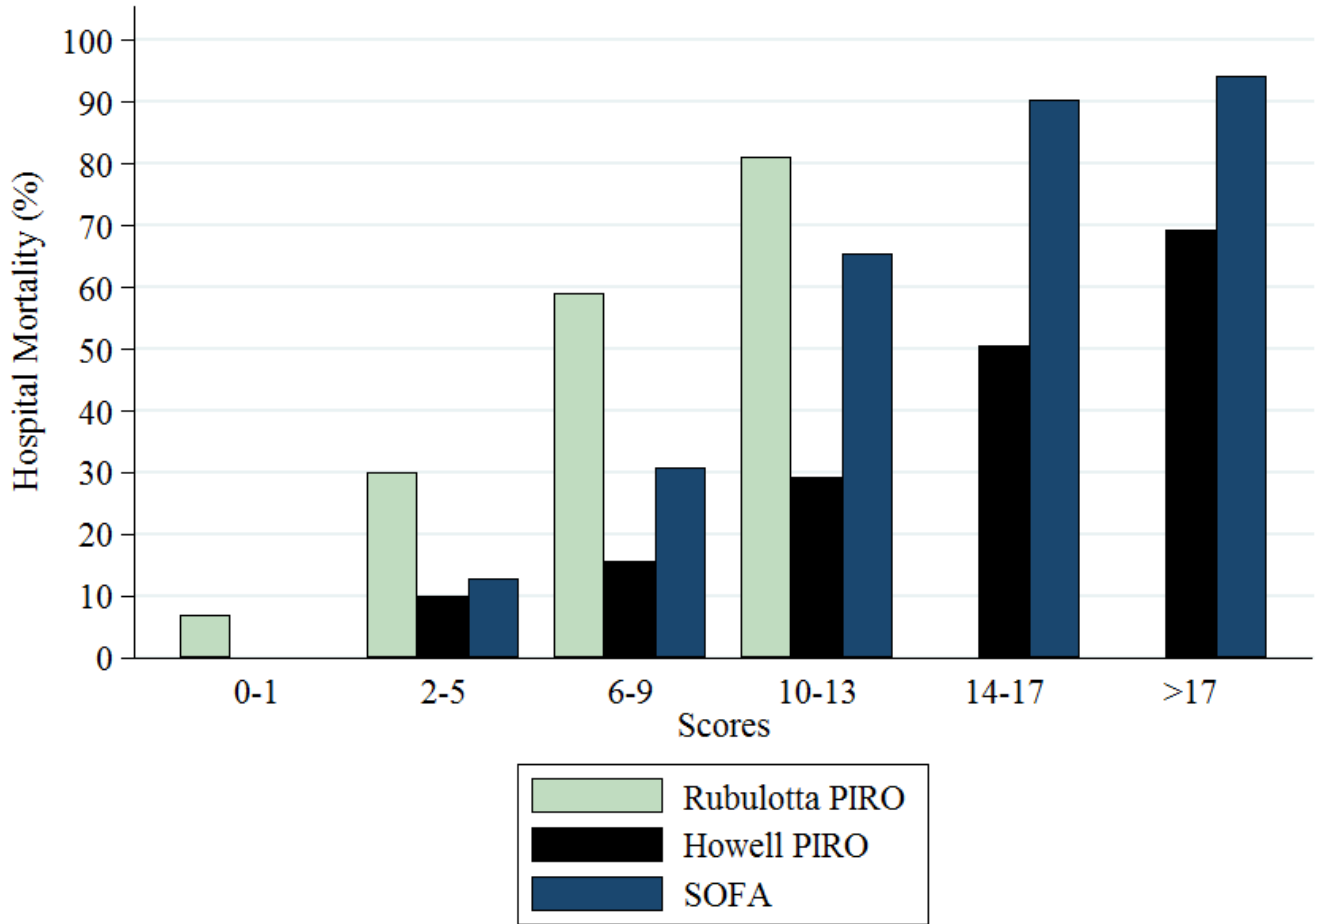

**Figure S2** Mortality risk stratified by Rubulotta PIRO, Howell PIRO and SOFA scores

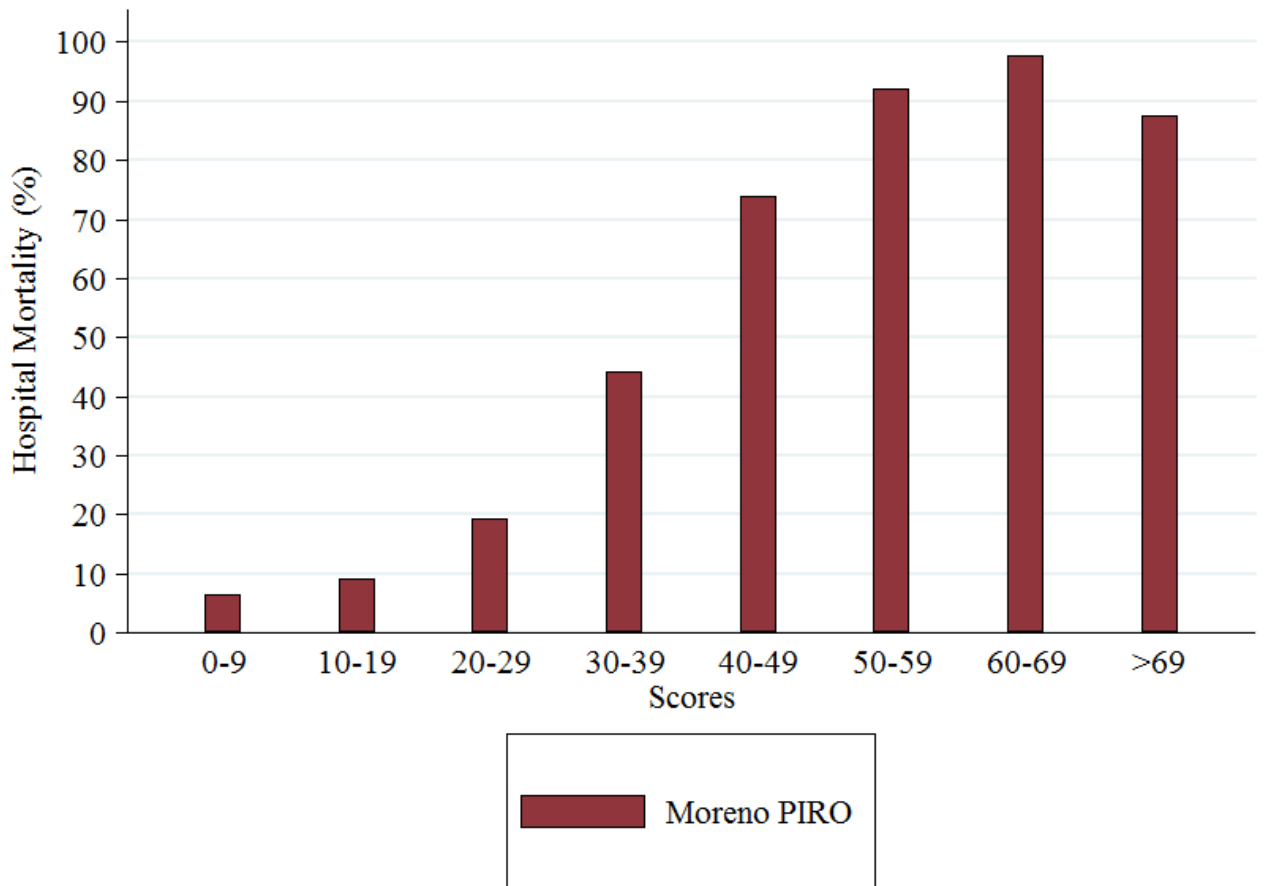

**Figure S3** Mortality risk stratified by Moreno PIRO score

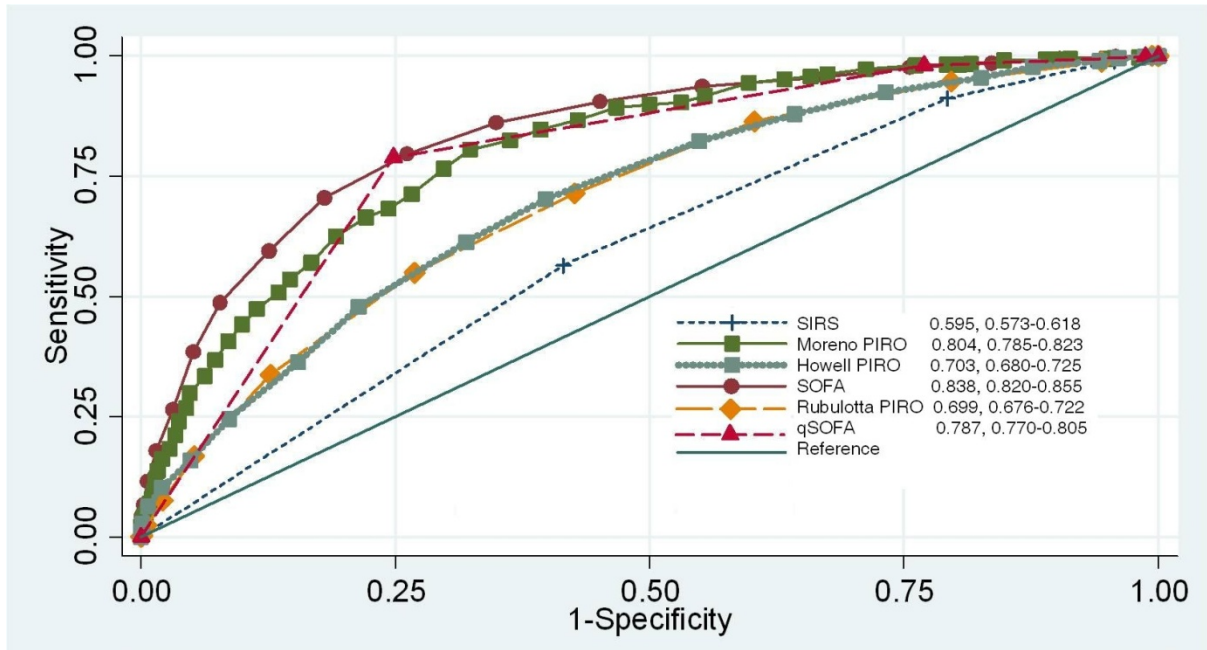

**Figure S4** Area under ROC with 95% confidence interval of severity scores for predict ICU mortality
